# Supplementary material
Source: Springer Nature journal article supplement (https://www.springermedizin.de/resource/supplementary/12889_2008_1491_MOESM4_ESM.pdf/9504408)
Supplement: MOESM4 [file 9504408]

### Overweight

### Obese

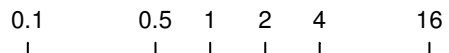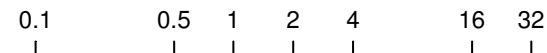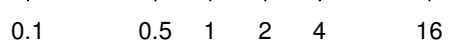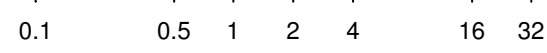

RR

RR

| Study                          | Obesity | Sex | Age   | F-up | Country     | N       | Outcome | Risk Est (95% CI)         | Risk Est (95% CI)         |
|--------------------------------|---------|-----|-------|------|-------------|---------|---------|---------------------------|---------------------------|
| Folsom (2000) [19]             | WC      | F   | 55-69 | 8.5  | US          | 31702   | IRR     | 0.61 (0.35 - 1.08)        | 1.35 (0.95 - 1.93)        |
| <b>IRR: All studies (1)</b>    |         |     |       |      |             |         |         | <b>0.61 (0.35 - 1.08)</b> | <b>1.35 (0.95 - 1.93)</b> |
| Rapp (2005) [45]               | BMI     | F   | 35-54 | 10.2 | Austria     | 78484   | IRR     | 1.54 (1.03 - 2.30)        | 1.97 (1.20 - 3.24)        |
| Lukanova (2006) [42]           | BMI     | F   | 30-60 | 8.3  | Sweden      | 35362   | IRR     | 1.46 (0.92 - 2.31)        | 1.73 (0.97 - 3.07)        |
| Engeland (2003) [50]           | BMI     | F   | 20-74 | 23   | Norway      | 1024468 | IRR     | 1.20 (1.14 - 1.26)        | 1.28 (1.20 - 1.37)        |
| Anderson (2004) [51]           | BMI     | F   | 55-69 | 15   | US          | 31381   | IRR     | 1.13 (0.83 - 1.53)        | 1.17 (0.83 - 1.65)        |
| Schouten (2003) [52]           | BMI     | F   | 55-69 | 7.3  | Netherlands | 1636    | IRR     | 1.09 (0.79 - 1.51)        | 1.44 (0.89 - 2.32)        |
| Jonsson (2003) [36]            | BMI     | F   | 44-83 | 26   | Sweden      | 11598   | IRR     | 1.00 (0.70 - 1.50)        | 0.30 (0.10 - 1.10)        |
| Tornberg (1994) [35]           | BMI     | F   | 25-75 | 20.3 | Sweden      | 47003   | IRR     | 0.96 (0.75 - 1.23)        | 1.29 (0.98 - 1.70)        |
| Fairfield (2002) [53]          | BMI     | F   | 30-55 | 15.6 | US          | 1636    | IRR     | 0.94 (0.74 - 1.19)        | 1.08 (0.80 - 1.45)        |
| Lukanova (2006) [42]           | BMI     | F   | 30-60 | 8.3  | Sweden      | 35362   | RR-P    | 1.76 (1.11 - 2.78)        | 1.98 (1.12 - 3.51)        |
| Rapp (2005) [45]               | BMI     | F   | 35-54 | 10.2 | Austria     | 78484   | RR-P    | 1.57 (1.05 - 2.35)        | 1.88 (1.14 - 3.08)        |
| Fairfield (2002) [53]          | BMI     | F   | 30-55 | 15.6 | US          | 1636    | RR-P    | 1.37 (1.08 - 1.73)        | 1.92 (1.43 - 2.57)        |
| Engeland (2003) [50]           | BMI     | F   | 20-74 | 23   | Norway      | 1024468 | RR-P    | 1.14 (1.09 - 1.20)        | 1.14 (1.07 - 1.22)        |
| Tornberg (1994) [35]           | BMI     | F   | 25-75 | 20.3 | Sweden      | 47003   | RR-P    | 0.91 (0.71 - 1.16)        | 1.15 (0.87 - 1.52)        |
| <b>IRR: All studies (8)</b>    |         |     |       |      |             |         |         | <b>1.18 (1.12 - 1.23)</b> | <b>1.28 (1.20 - 1.36)</b> |
| <b>RR-P: All studies (5)</b>   |         |     |       |      |             |         |         | <b>1.29 (1.12 - 1.50)</b> | <b>1.47 (1.13 - 1.91)</b> |
| <b>IRR: min.age&lt;55 (6)</b>  |         |     |       |      |             |         |         | <b>1.18 (1.13 - 1.24)</b> | <b>1.28 (1.20 - 1.36)</b> |
| <b>IRR: min.age&gt;=55 (2)</b> |         |     |       |      |             |         |         | <b>1.11 (0.89 - 1.39)</b> | <b>1.26 (0.95 - 1.66)</b> |
| <b>IRR: US studies (2)</b>     |         |     |       |      |             |         |         | <b>1.01 (0.84 - 1.21)</b> | <b>1.12 (0.89 - 1.40)</b> |
| <b>IRR: Europe studies (6)</b> |         |     |       |      |             |         |         | <b>1.19 (1.13 - 1.25)</b> | <b>1.29 (1.21 - 1.38)</b> |

IRR: All studies (8) 10.2(0.18)\* 1.18 (1.12 - 1.23) 1.28 (1.20 - 1.36)
